# Supplementary material for: Performance and Tolerability of the Moisturizers Cetaphil® and Excipial® in Atopic Dermatitis: What is the Evidence Based on Randomized Trials?
Source: PubMed Central journal article supplement — Dermatol Ther (Heidelb). 2017 Jun 9;7(3):331–47. doi: 10.1007/s13555-017-0184-3 (PMC5574736; doi:10.1007/s13555-017-0184-3), 2017-06-09
Supplement: 13555_2017_184_MOESM1_ESM.pdf [file 13555_2017_184_MOESM1_ESM.pdf]

Supportive information: Appendix 1 MEDLINE (Ovid) search strategy)

1. exp Dermatitis/
2. dermatitis.ti,ab.
3. exp Eczema/
4. eczema.ti,ab.
5. exp Neurodermatitis/
6. neurodermatitis.ti,ab.
7. exp Dermatitis, Atopic/
8. or/1-7
9. emollient\$.ti,ab. or exp Emollients/
10. moisturis\$.ti,ab.
11. moisturiz\$.ti,ab.
12. lubricant\$.ti,ab. or exp Lubricants/
13. ointment\$.ti,ab. or exp Ointments/
14. cream\$.ti,ab.
15. exp Skin Cream/
16. exp Oils/ or oil\$.ti,ab.
17. bath\$3.ti,ab. or exp Baths/
18. corticosteroid\$.ti,ab.
19. exp Steroids/ or steroid\$.ti,ab.
20. or/9-19
21. randomized controlled trial.pt.
22. controlled clinical trial.pt.
23. randomized.ab.
24. placebo.ab.
25. clinical trials as topic.sh.
26. randomly.ab.
27. trial.ti.
28. 21 or 22 or 23 or 24 or 25 or 26 or 27
29. exp animals/ not humans.sh.
30. 28 not 29
31. 8 and 20 and 30

[Lines 21-30: Cochrane Highly Sensitive Search Strategy for identifying randomized trials in MEDLINE: sensitivity- and precision-maximizing version (2008 revision)]
